1 **Multiplex genome editing by natural transformation (MuGENT)**  
2 **for synthetic biology in *Vibrio natriegens***

3

4 Triana N. Dalia<sup>1</sup>, Chelsea A. Hayes<sup>1</sup>, Sergey Stolyar<sup>2</sup>, Christopher J. Marx<sup>2</sup>, James B.  
5 McKinlay<sup>1</sup>, and Ankur B. Dalia<sup>1,\*</sup>

6

7 <sup>1</sup>Department of Biology, Indiana University, Bloomington, IN 47401. <sup>2</sup>Department of  
8 Biological Sciences, University of Idaho, Moscow, ID 83844.

9

10 \*Author for correspondence: Ankur B. Dalia, [ankdalia@indiana.edu](mailto:ankdalia@indiana.edu)

1 **ABSTRACT**

2 *Vibrio natriegens* has recently emerged as an alternative to *Escherichia coli* for molecular  
3 biology and biotechnology, but low-efficiency genetic tools hamper its development. Here,  
4 we uncover how to induce natural competence in *V. natriegens* and describe methods for  
5 multiplex genome editing by natural transformation (MuGENT). MuGENT promotes  
6 integration of multiple genome edits at high-efficiency on unprecedented timescales. Also,  
7 this method allows for generating highly complex mutant populations, which can be  
8 exploited for metabolic engineering efforts. As a proof-of-concept, we attempted to  
9 enhance production of the value added chemical poly- $\beta$ -hydroxybutyrate (PHB) in *V.*  
10 *natriegens* by targeting the expression of nine genes involved in PHB biosynthesis via  
11 MuGENT. Within 1 week, we isolated edited strains that produced  $\sim 100$  times more PHB  
12 than the parent isolate and  $\sim 3.3$  times more than a rationally designed strain. Thus, the  
13 methods described here should extend the utility of this species for diverse academic and  
14 industrial applications.

1 *V. natriegens* is the fastest growing organism known, with a doubling time of <10 min<sup>1,2</sup>.  
2 With broad metabolic capabilities, lack of pathogenicity, and its rapid growth rate, it is an  
3 attractive alternative to *E. coli* for diverse molecular biology and biotechnology  
4 applications<sup>3,4</sup>. Methods for classical genetic techniques have been developed for *V.*  
5 *natriegens*, but these are relatively laborious, require multiple steps, and must be used  
6 sequentially to generate multiple genome edits<sup>3,4</sup>. The challenges of these techniques  
7 contrast with the ease of genetics in *Vibrio* species that are naturally transformable.  
8 Competent *Vibrio* species can take up DNA from the environment and integrate it into their  
9 genome by homologous recombination; processes known as natural competence and  
10 natural transformation, respectively<sup>5-8</sup>. The inducing cue for natural transformation in  
11 competent *Vibrio* species is growth on the chitinous shells of crustacean zooplankton,  
12 which are commonly found in the aquatic environment where these microbes reside<sup>5</sup>.  
13 Chitin induces the expression of the competence regulator TfoX<sup>9,10</sup>. In fact, overexpression  
14 of TfoX obviates the need for chitin induction, allowing competent *Vibrio* species to be  
15 naturally transformed in rich media<sup>5,9</sup>.

16  
17 As no reports of natural transformation existed for *V. natriegens*, we first sought to  
18 establish whether this was possible. Unlike naturally competent *V. cholerae*, incubation on  
19 chitin did not lead to detectable transformation in *V. natriegens* (data not shown). However,  
20 ectopic expression of TfoX (either the endogenous *tfoX* gene or one from *Vibrio cholerae*)  
21 on an IPTG-inducible plasmid (pMMB) supported high rates of natural transformation (**Fig.**  
22 **1a**). This was tested using a linear PCR product that replaces the gene encoding the DNA  
23 endonuclease Dns with an antibiotic resistance (Ab<sup>R</sup>) marker. The *dns* locus was used as a  
24 target for transformation assays throughout this manuscript because loss of this gene does  
25 not impact growth or viability in rich medium. Under optimal conditions ~1-10% of the  
26 population had integrated the transforming DNA (tDNA), which matches the highest rates  
27 of transformation observed among competent species<sup>11</sup> (**Fig. 1a-c**). Natural transformation  
28 of *V. natriegens* required very little transforming DNA (tDNA) (highly efficient with even 1  
29 ng / 10<sup>8</sup> CFU) and was dependent on the length of homologous sequence surrounding the  
30 mutation (**Fig. 1b and c**). This method could also be used to introduce point mutations into

1 *V. natriegens* (tested with tDNA containing an *rpsL* K43R Sm<sup>R</sup> allele); however, this activity  
2 was partially suppressed by the mismatch repair system (**Fig. 1d**).

3  
4 Having demonstrated *V. natriegens* is naturally competent, we sought to determine if we  
5 could use natural transformation to perform scarless multiplex genome editing by natural  
6 transformation (MuGENT)<sup>12</sup>. MuGENT operates under the premise that under competence  
7 inducing conditions, only a subpopulation of cells is transformable. Those cells that can be  
8 transformed, however, have the capacity to take up and integrate multiple tDNAs<sup>12, 13</sup>. Thus,  
9 during MuGENT, cells are incubated with two types of linear tDNA; (1) a selected product  
10 that introduces an antibiotic resistance marker into the genome and (2) unselected  
11 products that introduce scarless genome edits of interest at one or more loci.

12  
13 We first tested the ability of MuGENT to introduce a single unmarked genome edit (also  
14 known as cotransformation). To facilitate measurement of cotransformation, we noted this  
15 species forms opaque colonies on agar plates (**Fig. 2a**), which could be due to the  
16 production of a capsular polysaccharide. Consistent with this, inactivating a homolog of the  
17 essential capsule biosynthesis gene *wbFF*<sup>14</sup> resulted in the formation of transparent  
18 colonies on agar plates and loss of expression of a high molecular weight polysaccharide  
19 (**Fig. 2a and 2b**). Thus, to test cotransformation we used an unselected product to replace  
20 ~500 bp of the 5' end of the *wbFF* gene with a premature stop codon and scored  
21 cotransformation via colony morphology (opaque vs. transparent) on agar plates (**Fig. 3a**).  
22 We found that cotransformation was remarkably efficient in *V. natriegens* (up to ~80%),  
23 even with low amounts (~25-50 ng / 10<sup>8</sup> CFU) of the unselected product (**Fig. 3b**). Also,  
24 cotransformation with 1 kb flanks on the unselected product was possible, but at ~6-fold  
25 lower frequencies than with 3 kb flanks (**Fig. 3c**).

26  
27 We next tested the full multiplex genome editing capacity of MuGENT to simultaneously  
28 cotransform multiple scarless genome edits into the genome in a single step<sup>12, 15</sup>. Since  
29 there is no selection for integration of the unselected genome edits *in cis* during MuGENT,  
30 output populations are highly heterogeneous and individual mutants contain any number  
31 and combination of the multiplexed genome edits. Also, this process can be carried out in

1 multiple iterative cycles to further increase the complexity of genome edits in the  
2 population (**Fig. 3d**)<sup>12</sup>.

3  
4 As an initial test of multiplex genome editing, we targeted 5 genes whose mutagenesis was  
5 considered unlikely to affect viability or growth in LB. These targets included four  
6 carbohydrate transporters (specific for mannitol, fructose, sucrose, and trehalose – all of  
7 which are absent in LB) and the *dns* gene. All genes were targeted for inactivation by  
8 replacing ~500 bp of the 5' end of each gene with a premature stop codon. Integration of  
9 genome edits was determined by multiplex allele-specific colony PCR (MASC-PCR)<sup>16</sup> (**Fig.**  
10 **3e**). Following one cycle of MuGENT, we found that ~70% of the population contained at  
11 least 1 genome edit, with ~25% of the population containing 3-4 genome edits (**Fig. 3f**). A  
12 quadruple mutant from this experiment was isolated and whole genome sequencing of this  
13 strain did not reveal any off-target mutations. Thus, MuGENT rapidly generated *V.*  
14 *natriegens* strains with multiple large (0.5 kb) scarless genome edits at high-efficiency  
15 without off-target effects, and can be used to make highly complex mutant populations.

16  
17 As a second demonstration of multiplex genome editing, we demonstrated its utility in  
18 metabolic engineering by attempting to rapidly enhance production of a value-added  
19 chemical in *V. natriegens*. This species naturally accumulates low levels of the bioplastic  
20 precursor poly- $\beta$ -hydroxybutyrate (PHB) as a storage polymer<sup>17</sup>. PHB is derived from the  
21 condensation and subsequent NADPH-dependent reduction of acetyl-CoA precursors<sup>18</sup>.  
22 Thus, for our targets, we tuned the expression (swap out  $P_{native}$  for IPTG-inducible  $P_{tac}$ ) or  
23 inactivated genes that we hypothesized would affect NADPH and/or acetyl-CoA availability.  
24 The targets for promoter swaps were the PHB synthesis operon (*phaBAC*), NAD kinase  
25 (*nadK*), and two transhydrogenases (*pntAB* and *udhA*), while targets for inactivation were  
26 phosphoglucose isomerase (*pgi*), citrate synthase (*gltA*), phosphotransacetylase (*pta*),  
27 isocitrate lyase (*aceA*), and lactate dehydrogenase (*ldhA*) (**Fig. 4a**). Thus, there were 512  
28 possible combinations for these 9 genome edits. We performed multiple cycles of MuGENT  
29 to introduce these genome edits into a competent population of *V. natriegens*. At each cycle,  
30 the selected product was designed to swap the Ab<sup>R</sup> marker at the *dns* locus to maintain  
31 coselection at each step. Following four cycles of MuGENT, which took just 5 days to

1 perform, ~50% of the population had 3 or more genome edits and ~10% contained 5+  
2 genome edits (**Fig. 4b**). To select mutants with increased PHB production, we then plated  
3 this output population onto media containing Nile red, which stains PHB granules<sup>19</sup>. Nile  
4 red fluorescence on these plates was highly heterogeneous, suggesting that some  
5 genotypes produced more PHB than the parent isolate (**Fig. 4c**). A number of highly  
6 fluorescent colonies were picked and the genotypes determined by MASC-PCR. Also, PHB in  
7 these select strains was directly measured by HPLC. Cumulatively, these analyses rapidly  
8 revealed genotypes that produced ~100-fold more PHB than the parent and ~3.3-fold  
9 more than a strain with just the *P<sub>tac</sub>-phaBAC* mutation (**Fig. 4d**). Overexpression of the  
10 *phaBAC* locus is a commonly used rational approach for enhancing PHB production<sup>18, 20</sup>.  
11 Thus, this result demonstrates that MuGENT can allow for rapid isolation of genotypes  
12 associated with enhanced phenotypes (e.g. enhanced PHB production) compared to  
13 rationally engineered strains (e.g. a *P<sub>tac</sub>-phaBAC* mutant) without prior knowledge of  
14 effective combinations of individual mutations.

15  
16 While many methods for multiplex genome editing in bacterial systems have been  
17 described<sup>21</sup>, many of these are limited to small changes such as SNPs. MuGENT, on the  
18 other hand, can efficiently swap, insert, or remove whole promoters or coding sequences as  
19 demonstrated above. Furthermore, one of the major limitations to other multiplex genome  
20 editing methods is that mutagenesis must be performed in strains lacking DNA repair  
21 pathways to allow for high-efficiency integration of genome edits, which results in a large  
22 number of off-target mutations<sup>16, 21</sup>. MuGENT in *V. natriegens* is performed in DNA repair  
23 sufficient backgrounds, thus, little to no off target mutations are introduced during the  
24 procedure as indicated above. Also, unlike other multiplex editing approaches, MuGENT  
25 requires no specialized equipment and, thus, has the potential to make multiplex genome  
26 editing commonplace.

27  
28 In conclusion, this study demonstrates that MuGENT is a rapid, efficient, and simple tool for  
29 engineering the *V. natriegens* genome. This microbe is already being developed as an  
30 alternative to *E. coli*, and we believe that the ease and speed of MuGENT will extend the use

1 of *V. natriegens* as a novel chassis for diverse molecular biology and biotechnology  
2 applications.

### 3 **METHODS**

#### 4 *Bacterial strains and culture conditions*

5 The parent *V. natriegens* strain used throughout this study was a spontaneous rifampicin-  
6 resistant derivative of ATCC 14048<sup>2</sup>. For a list of all strains used / generated in this study,  
7 see **Table S1**. Strains were routinely grown in LB+v2 salts (LBv2)<sup>3</sup>, which is LB Miller broth  
8 (BD) supplemented with 200 mM NaCl, 23.14 mM MgCl<sub>2</sub>, and 4.2 mM KCl. LBv2 was  
9 supplemented with 100 μM IPTG, 50 μg/mL kanamycin (Kan), 200 μg/mL spectinomycin  
10 (Spec), 100 μg/mL rifampicin (Rif), 100 μg/mL streptomycin (Sm), or 100 μg/mL  
11 carbenicillin (Carb) as appropriate.

12

#### 13 *Generation of mutant strains and constructs*

14 Mutant constructs were generated by splicing-by-overlap extension (SOE) PCR exactly as  
15 previously described<sup>22</sup>. Briefly, for three-piece mutant constructs (i.e. for constructs where  
16 a gene of interest is replaced with an Ab<sup>R</sup> cassette or where the native promoter is swapped  
17 for a P<sub>tac</sub> promoter) segments were designated UP, MIDDLE, and DOWN and correspond to:  
18 (1) UP = the upstream region of homology amplified with F1 and R1 primers, (2) DOWN =  
19 the downstream region of homology amplified with F2 and R2 primers, and (3) MIDDLE =  
20 the Ab<sup>R</sup> marker or promoter swap fragment. For two-piece mutant constructs (i.e. for  
21 constructs where ~501 bp of the 5' end of a gene is replaced with a stop codon), the  
22 mutation of interest is incorporated into the R1 and F2 primers used to amplify the  
23 upstream and downstream regions of homology, respectively. Gel purified segments were  
24 then mixed in equal ratios and used as template for a SOE PCR reaction with the F1 and R2  
25 primers. All mutant constructs were made using Phusion polymerase. These were  
26 introduced into the *V. natriegens* genome via natural transformation as described below.

27 All primers used to generate mutant constructs are listed in **Table S2**.

28

#### 29 *Natural transformation / MuGENT assays*

30 Strains harboring pMMB-*tfoX* (*Vn tfoX* or *Vc tfoX*) were induced to competence by growing  
31 overnight (12-18 hours) in LBv2+100 μg/mL carbenicillin+100 μM IPTG in a rollerdrum at

1 30°C. Then,  $\sim 10^8$  CFUs of this overnight culture ( $\sim 3.5 \mu\text{L}$ ) were diluted directly into 350  $\mu\text{L}$   
2 of instant ocean medium (28 g/L; Aquarium Systems Inc.) supplemented with 100  $\mu\text{M}$   
3 IPTG. Transforming DNA (tDNA) was then added as indicated, and reactions were  
4 incubated statically at 30°C for 5 hours. Next, 1 mL of LBv2 was added and reactions were  
5 outgrown at 30°C with shaking (250 rpm) for  $\sim 1$ -2 hrs. Then, reactions were plated for  
6 quantitative culture onto media to select for integration of tDNA (i.e. LB+drug =  
7 transformants) and onto nonselective media (i.e. plain LB = total viable counts).  
8 Transformation efficiency is shown as: transformants / total viable counts.

9  
10 For MuGENT, transformation assays were conducted exactly as described above. Unless  
11 otherwise specified,  $\sim 50$  ng of the selected product was incubated with cells along with  
12  $\sim 200$  ng of each unselected product. After outgrowth, 1/10<sup>th</sup> of the reaction was removed  
13 and plated for MASC-PCR analysis (described below). If multiple cycles of MuGENT were  
14 performed, the rest of the reaction was grown overnight in LBv2 supplemented with 100  
15  $\mu\text{M}$  IPTG, 100 $\mu\text{g}/\text{mL}$  carbenicillin (to maintain pMMB-*tfoX*), and the antibiotic to select for  
16 integration of the selected product. The following day, the population was then subjected to  
17 another round of MuGENT as described above using a selected product containing a  
18 different Ab<sup>R</sup> marker to maintain coselection at each cycle.

19  
20 Integration of genome edits was detected via MASC-PCR exactly as previously described<sup>12,</sup>  
21 <sup>16</sup>. Briefly, colonies were boiled in 50  $\mu\text{L}$  of sterile water, vortexed, and then 2  $\mu\text{L}$  were used  
22 as template in a 25  $\mu\text{L}$  PCR reaction. PCR was conducted with Taq polymerase (SydLabs)  
23 using a modified 5X Taq buffer: 200 mM Tris pH 8.8, 100 mM KCl, 100 mM  $(\text{NH}_4)_2\text{SO}_4$ , 30  
24 mM  $\text{MgSO}_4$ , and 1% Triton X-100. The total primer used in each MASC-PCR reaction  
25 (regardless of the number of multiplexed products being detected) was 1200 nM (i.e. for  
26 detection of 4 multiplexed genome edits, 300 nM of each genome edit-specific primer pair  
27 was used). The cycling conditions used were: 95°C 3 min; 26  $\times$  [95°C 40s, 58°C 30s, 72°C 3  
28 min]; 72°C 3 min; 12°C hold. Reactions were then run on 2% agarose gels and imaged with  
29 GelGreen dye according to manufacturer's instructions (Biotium). For a list of all primers  
30 used for MASC-PCR see **Table S2**.

31



1 *Alcian blue stained gels*

2 To prepare cell lysates,  $\sim 10^9$  cells of the indicated *V. natriegens* strains were pelleted and  
3 then resuspended in 180  $\mu$ L of Buffer ATL (Qiagen). Then, 20  $\mu$ L of a 20 mg/mL proteinase  
4 K stock solution was added to each reaction and incubated at 56°C for 20 mins. Samples  
5 were then boiled in 2X SDS PAGE sample buffer and separated on 4-12% SDS PAGE gels.  
6 Gels were then stained with 0.1% Alcian Blue 8GX in 40% ethanol/3% acetic acid as  
7 previously described<sup>23</sup>. The gel was then destained in a 40% ethanol/3% acetic acid and  
8 imaged on a Biorad ChemiDoc MP Imaging system.

9  
10 *Whole genome sequencing*

11 Genomic DNA was prepped from strains and sequencing libraries were prepped via  
12 homopolymer-tail mediated ligation exactly as previously described<sup>24</sup>. Single-end 50 bp  
13 reads were collected on the Illumina platform. Then, data was analyzed for small indels and  
14 single nucleotide variants using CLC Genomics Workbench exactly as previously  
15 described<sup>15, 25</sup>.

16  
17 *Qualitative and quantitative assessment of PHB production*

18 PHB was qualitatively assessed in MuGENT edited populations of *V. natriegens* by plating  
19 onto Nile red containing medium with excess glucose as a carbon source and 100  $\mu$ M IPTG  
20 to induce  $P_{tac}$ -containing genome edits = recipe per L: 28 g instant ocean, 2.5 g tryptone, 1 g  
21 yeast extract, 20 g glucose, 15 g agar, and 1 mg Nile red. Fluorescence of colonies was  
22 detected using a PrepOne Sapphire LED blue light base (475 nm  $\pm$  30 nm) and amber filter  
23 (530 nm long pass) (Embi Tec).

24  
25 For quantitative assessment of PHB levels, the indicated strains were grown overnight in  
26 M9 minimal medium (BD) supplemented with 2 mM MgSO<sub>4</sub>, 100  $\mu$ M CaCl<sub>2</sub>, 200 mM NaCl,  
27 30  $\mu$ M FeSO<sub>4</sub>, 100  $\mu$ M IPTG, 1% tryptone, and 2% glucose. Approximately  $8 \times 10^9$  cells were  
28 then pelleted, resuspended with 50  $\mu$ L water and transferred to pre-weighed glass screw-  
29 cap tubes. Cell suspensions were dried for 5 h at 80°C and then the tubes were weighed  
30 again to determine dry cell weights. PHB was then hydrolyzed and extracted as crotonic  
31 acid by boiling the dried cells in 1 ml of pure sulfuric acid. Extracts were chilled on ice and

1 diluted with 4 ml ice-cold water. Aliquots were further diluted 10-fold with water,  
2 centrifuged, filtered, and then crotonic acid was quantified by HPLC as described<sup>26</sup>.

3

#### 4 **ACKNOWLEDGEMENTS**

5 We would like to thank Tufts TUCF Genomics and the Indiana University CGB for assistance  
6 with whole genome sequencing of strains. This work was supported by  
7 US National Institutes of Health Grant AI118863 to ABD. JBM and ABD were also supported  
8 by the Indiana University College of Arts and Sciences.

9

#### 10 **COMPETING FINANCIAL INTERESTS**

11 MuGENT is the subject of a pending patent application.

12

#### 13 **AUTHOR CONTRIBUTIONS**

14 ABD conceived the study. TND, SS, CJM, JMB, and ABD designed experiments. TND, CAH,  
15 JMB, and ABD performed experiments. All authors played a role in writing and/or  
16 proofreading the manuscript.

17

#### 18 **SUPPORTING INFORMATION**

19 Supplementary protocol: Natural transformation / MuGENT in *V. natriegens*.

20 Supplementary Tables S1-S2: strains and primers used in this study.

21

#### 22 **REFERENCES**

23 [1] Eagon, R. G. (1962) *Pseudomonas natriegens*, a marine bacterium with a generation  
24 time of less than 10 minutes, *J Bacteriol* 83, 736-737.

25 [2] Payne, W. J., Eagon, R. G., and Williams, A. K. (1961) Some observations on the  
26 physiology of *Pseudomonas natriegens* nov. spec, *Antonie Van Leeuwenhoek* 27, 121-  
27 128.

28 [3] Weinstock, M. T., Heseck, E. D., Wilson, C. M., and Gibson, D. G. (2016) *Vibrio natriegens*  
29 as a fast-growing host for molecular biology, *Nat Methods* 13, 849-851.

30 [4] Lee, H. H., Ostrov, N., Wong, B. G., Gold, M. A., Khalil, A., and Church, G. M. (2016) *Vibrio*  
31 *natriegens*, a new genomic powerhouse, *bioRxiv*, doi:10.1101/058487.

- 1 [5] Meibom, K. L., Blokesch, M., Dolganov, N. A., Wu, C. Y., and Schoolnik, G. K. (2005) Chitin  
2 induces natural competence in *Vibrio cholerae*, *Science* 310, 1824-1827.
- 3 [6] Chen, Y., Dai, J., Morris, J. G., Jr., and Johnson, J. A. (2010) Genetic analysis of the capsule  
4 polysaccharide (K antigen) and exopolysaccharide genes in pandemic *Vibrio*  
5 *parahaemolyticus* O3:K6, *BMC Microbiol* 10, 274.
- 6 [7] Gulig, P. A., Tucker, M. S., Thiaville, P. C., Joseph, J. L., and Brown, R. N. (2009) USER  
7 friendly cloning coupled with chitin-based natural transformation enables rapid  
8 mutagenesis of *Vibrio vulnificus*, *Appl Environ Microbiol* 75, 4936-4949.
- 9 [8] Pollack-Berti, A., Wollenberg, M. S., and Ruby, E. G. (2010) Natural transformation of  
10 *Vibrio fischeri* requires *tfoX* and *tfoY*, *Environ Microbiol* 12, 2302-2311.
- 11 [9] Dalia, A. B., Lazinski, D. W., and Camilli, A. (2014) Identification of a membrane-bound  
12 transcriptional regulator that links chitin and natural competence in *Vibrio*  
13 *cholerae*, *MBio* 5, e01028-01013.
- 14 [10] Yamamoto, S., Mitobe, J., Ishikawa, T., Wai, S. N., Ohnishi, M., Watanabe, H., and  
15 Izumiya, H. (2014) Regulation of natural competence by the orphan two-component  
16 system sensor kinase ChiS involves a non-canonical transmembrane regulator in  
17 *Vibrio cholerae*, *Mol Microbiol* 91, 326-347.
- 18 [11] Lorenz, M. G., and Wackernagel, W. (1994) Bacterial gene transfer by natural genetic  
19 transformation in the environment, *Microbiol Rev* 58, 563-602.
- 20 [12] Dalia, A. B., McDonough, E., and Camilli, A. (2014) Multiplex genome editing by natural  
21 transformation, *Proc Natl Acad Sci U S A* 111, 8937-8942.
- 22 [13] Erickson, R. J., and Copeland, J. C. (1973) Congression of unlinked markers and genetic  
23 mapping in the transformation of *Bacillus subtilis* 168, *Genetics* 73, 13-21.
- 24 [14] Bik, E. M., Bunschoten, A. E., Willems, R. J., Chang, A. C., and Mooi, F. R. (1996) Genetic  
25 organization and functional analysis of the *otn* DNA essential for cell-wall  
26 polysaccharide synthesis in *Vibrio cholerae* O139, *Mol Microbiol* 20, 799-811.
- 27 [15] Hayes, C. A., Dalia, T. N., and Dalia, A. B. (2017) Systematic genetic dissection of PTS in  
28 *Vibrio cholerae* uncovers a novel glucose transporter and a limited role for PTS  
29 during infection of a mammalian host, *Mol Microbiol*.

- 1 [16] Wang, H. H., Isaacs, F. J., Carr, P. A., Sun, Z. Z., Xu, G., Forest, C. R., and Church, G. M.  
2 (2009) Programming cells by multiplex genome engineering and accelerated  
3 evolution, *Nature* 460, 894-898.
- 4 [17] Chien, C. C., Chen, C. C., Choi, M. H., Kung, S. S., and Wei, Y. H. (2007) Production of poly-  
5 beta-hydroxybutyrate (PHB) by *Vibrio* spp. isolated from marine environment, *J*  
6 *Biotechnol* 132, 259-263.
- 7 [18] Centeno-Leija, S., Huerta-Beristain, G., Giles-Gomez, M., Bolivar, F., Gosset, G., and  
8 Martinez, A. (2014) Improving poly-3-hydroxybutyrate production in *Escherichia*  
9 *coli* by combining the increase in the NADPH pool and acetyl-CoA availability,  
10 *Antonie Van Leeuwenhoek* 105, 687-696.
- 11 [19] Spiekermann, P., Rehm, B. H., Kalscheuer, R., Baumeister, D., and Steinbuchel, A. (1999)  
12 A sensitive, viable-colony staining method using Nile red for direct screening of  
13 bacteria that accumulate polyhydroxyalkanoic acids and other lipid storage  
14 compounds, *Arch Microbiol* 171, 73-80.
- 15 [20] Kidwell, J., Valentin, H. E., and Dennis, D. (1995) Regulated expression of the  
16 *Alcaligenes eutrophus pha* biosynthesis genes in *Escherichia coli*, *Appl Environ*  
17 *Microbiol* 61, 1391-1398.
- 18 [21] Csorgo, B., Nyerges, A., Posfai, G., and Feher, T. (2016) System-level genome editing in  
19 microbes, *Curr Opin Microbiol* 33, 113-122.
- 20 [22] Dalia, A. B., Lazinski, D. W., and Camilli, A. (2013) Characterization of undermethylated  
21 sites in *Vibrio cholerae*, *J Bacteriol* 195, 2389-2399.
- 22 [23] Mercaldi, M. P., Dams-Kozłowska, H., Panilaitis, B., Joyce, A. P., and Kaplan, D. L. (2008)  
23 Discovery of the dual polysaccharide composition of emulsan and the isolation of  
24 the emulsion stabilizing component, *Biomacromolecules* 9, 1988-1996.
- 25 [24] Lazinski, D. W., and Camilli, A. (2013) Homopolymer tail-mediated ligation PCR: a  
26 streamlined and highly efficient method for DNA cloning and library construction,  
27 *Biotechniques* 54, 25-34.
- 28 [25] Seed, K. D., Yen, M., Shapiro, B. J., Hilaire, I. J., Charles, R. C., Teng, J. E., Ivers, L. C., Boncy,  
29 J., Harris, J. B., and Camilli, A. (2014) Evolutionary consequences of intra-patient  
30 phage predation on microbial populations, *eLife* 3, e03497.

1 [26] Karr, D. B., Waters, J. K., and Emerich, D. W. (1983) Analysis of Poly-beta-  
2 Hydroxybutyrate in *Rhizobium japonicum* Bacteroids by Ion-Exclusion High-  
3 Pressure Liquid Chromatography and UV Detection, *Appl Environ Microbiol* 46,  
4 1339-1344.

## 6 **FIGURE LEGENDS**

7 **Fig. 1** – *Natural transformation of V. natriegens.* (**a-d**) Transformation assays of *V.*  
8 *natriegens.* (**a**) *V. natriegens* strains containing a pMMB empty vector or pMMB with the  
9 *tfoX* gene from either *V. natriegens* (Vn) or *V. cholerae* (Vc) were transformed with 100 ng  
10 of a  $\Delta dns::Kan^R$  tDNA containing 3 kb flanks of homology on both sides of the mutation (i.e.  
11 3 kb/3 kb). Transformation assay of *V. natriegens* pMMB-*tfoX* (Vc) with (**b**) the indicated  
12 concentration of  $\Delta dns::Kan^R$  (3 kb/3 kb) tDNA or (**c**) 5 ng of  $\Delta dns::Kan^R$  tDNA containing  
13 the indicated amount of homology on each side of the mutation. (**d**) Transformation assay  
14 in the indicated strain backgrounds with 5 ng of *rpsL* K43R  $Sm^R$  (3 kb/3 kb) or  $\Delta dns::Spec^R$   
15 (3 kb/3 kb) tDNA as indicated. All strains in **d** harbor  $\Delta dns::Kan^R$  mutations and pMMB-*tfoX*  
16 (Vc). All data are shown as the mean  $\pm$  SD and are the result of at least 4 independent  
17 biological replicates. \*\* =  $p < 0.01$ .

18  
19 **Fig. 2** – *V. natriegens produces a WbfF-dependent capsular polysaccharide.* (**a**) Colony  
20 morphologies of parent (white arrow) and  $\Delta wbfF$  (black arrow) strains, which demonstrate  
21 the phenotypes screened for in cotransformation assays. (**b**) Cell lysates of the indicated  
22 strains were run on a 4-12% SDS PAGE gel and stained with the carbohydrate stain Alcian  
23 blue. The presence of a high molecular weight polysaccharide in the parent is indicated by a  
24 red arrow.

25  
26 **Fig. 3** – *Cotransformation is highly efficient in V. natriegens.* (**a**) Cotransformation was  
27 tested using a  $\Delta dns::Kan^R$  (3 kb/3 kb) selected product and an unselected product that  
28 deleted ~500 bp of the 5' end of *wbfF* gene. Cotransformation assays were performed using  
29 50ng of the  $\Delta dns::Kan^R$  (3 kb/3 kb) selected product and (**b**) the indicated amount of the  
30  $\Delta wbfF$  (3 kb/3 kb) unselected product or (**c**) 200 ng of  $\Delta wbfF$  unselected products  
31 containing the indicated length of homology on each side of the mutation. Data in **b** and **c**

1 are from at least four independent biological replicates and shown as the mean  $\pm$  SD. **(d)**  
2 Schematic of MuGENT. The selected product is indicated by a red box, while multiple  
3 unselected genome edits are depicted by distinct gray shapes. Since there is no selection for  
4 genome edits *in cis*, output mutants can have any number and combination of the  
5 unselected genome edits. Circles inside cells represent the two circular chromosomes of *V.*  
6 *natriegens*. **(e and f)** MuGENT was performed with 5 unselected genome edits. The selected  
7 product was  $\Delta wbfF::Kan^R$ , while the unselected products targeted four carbohydrate  
8 transporters and *dns* for inactivation by replacing  $\sim$ 500 bp of the 5' end of each gene with a  
9 premature stop codon. **(e)** A representative MASC-PCR gel of 24 colonies from the edited  
10 population. The targets of each genome edit are indicated on the left and the presence of a  
11 band indicates integration of the indicated genome edit. Strains containing 4 genome edits  
12 are indicated by the green arrows. **(f)** Distribution of genome edits in the population  
13 determined by MASC-PCR analysis of 48 random mutants.

14

15 **Fig. 4 – MuGENT rapidly enhances PHB production in *V. natriegens*.** **(a)** The indicated  
16 targets were subjected to either a promoter swap (top) or inactivation by replacing  
17  $\sim$ 500bp of the 5' end of each gene with a short sequence to introduce a premature stop  
18 codon (bottom). **(b)** Distribution of the 9 genome edits in a population of cells following  
19 four cycles of MuGENT. **(c)** Representative image of the mutant pool generated in **b** plated  
20 on Nile red containing plates, which stain PHB granules. White arrows indicate colonies  
21 with increased fluorescence intensity compared to the parent. **(d)** PHB content of select  
22 MuGENT optimized strains is shown as the % of dry cell weight (DCW). The genotype of  
23 each mutant is shown below each bar where a filled box indicates the presence of the  
24 genome edit indicated on the left. Data are shown as the mean  $\pm$  SD and are from at least 2  
25 independent biological replicates. \* =  $p < 0.05$ .

26

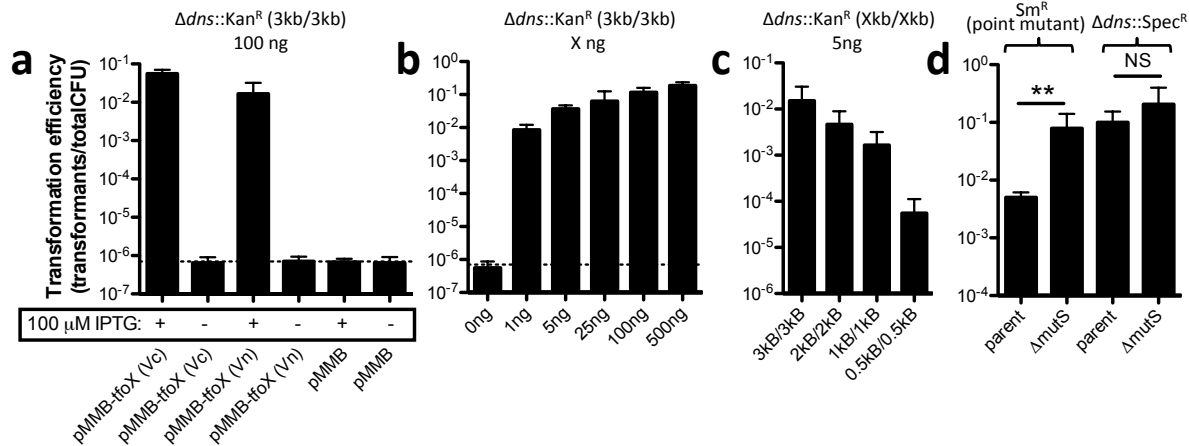

**Fig. 1** – Natural transformation of *V. natriegens*. **(a-d)** Transformation assays of *V. natriegens*. **(a)** *V. natriegens* strains containing a pMMB empty vector or pMMB with the *tfoX* gene from either *V. natriegens* (Vn) or *V. cholerae* (Vc) were transformed with 100 ng of a  $\Delta dns::Kan^R$  tDNA containing 3 kb flanks of homology on both sides of the mutation (i.e. 3 kb/3 kb). Transformation assay of *V. natriegens* pMMB-*tfoX* (Vc) with **(b)** the indicated concentration of  $\Delta dns::Kan^R$  (3 kb/3 kb) tDNA or **(c)** 5 ng of  $\Delta dns::Kan^R$  tDNA containing the indicated amount of homology on each side of the mutation. **(d)** Transformation assay in the indicated strain backgrounds with 5 ng of *rpsL* K43R  $Sm^R$  (3 kb/3 kb) or  $\Delta dns::Spec^R$  (3 kb/3 kb) tDNA as indicated. All strains in **d** harbor  $\Delta dns::Kan^R$  mutations and pMMB-*tfoX* (Vc). All data are shown as the mean  $\pm$  SD and are the result of at least 4 independent biological replicates. \*\* =  $p < 0.01$ .

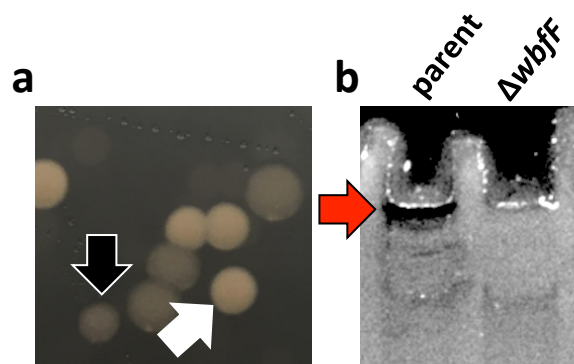

**Fig. 2** – *V. natriegens* produces a *WbfF*-dependent capsular polysaccharide. (a) Colony morphologies of parent (white arrow) and  $\Delta wbfF$  (black arrow) strains, which demonstrate the phenotypes screened for in cotransformation assays. (b) Cell lysates of the indicated strains were run on a 4-12% SDS PAGE gel and stained with the carbohydrate stain Alcian blue. The presence of a high molecular weight polysaccharide in the parent is indicated by a red arrow.



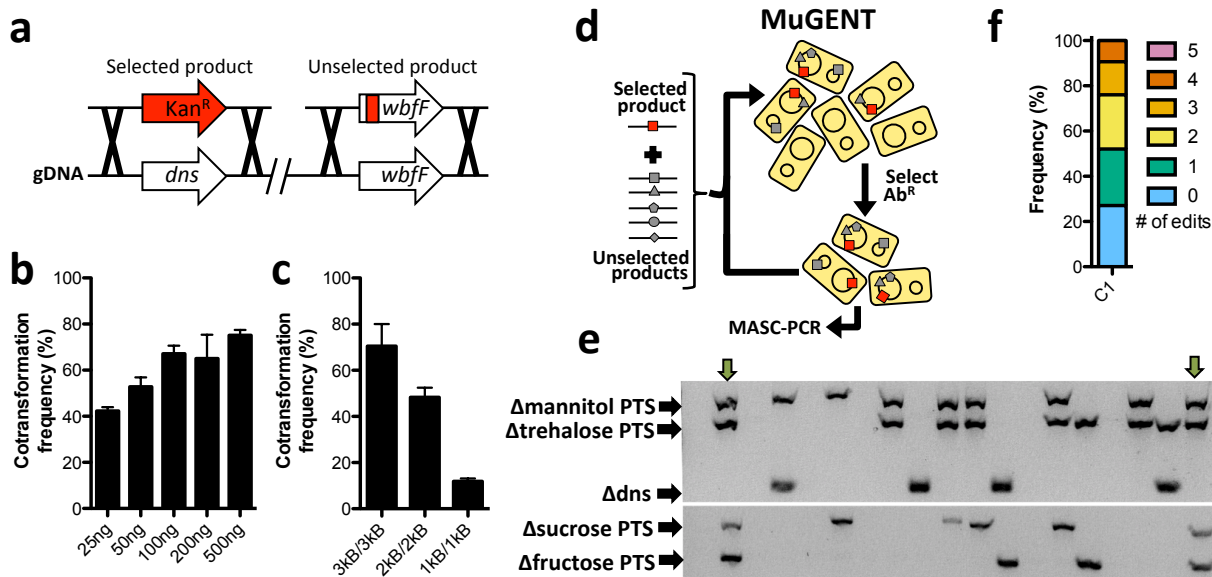

**Fig. 3 – Cotransformation is highly efficient in *V. natriegens*.** (a) Cotransformation was tested using a  $\Delta dns::Kan^R$  (3 kb/3 kb) selected product and an unselected product that deleted ~500 bp of the 5' end of *wbff* gene. Cotransformation assays were performed using 50ng of the  $\Delta dns::Kan^R$  (3 kb/3 kb) selected product and (b) the indicated amount of the  $\Delta wbff$  (3 kb/3 kb) unselected product or (c) 200 ng of  $\Delta wbff$  unselected products containing the indicated length of homology on each side of the mutation. Data in b and c are from at least four independent biological replicates and shown as the mean  $\pm$  SD. (d) Schematic of MuGENT. The selected product is indicated by a red box, while multiple unselected genome edits are depicted by distinct gray shapes. Since there is no selection for genome edits *in cis*, output mutants can have any number and combination of the unselected genome edits. Circles inside cells represent the two circular chromosomes of *V. natriegens*. (e and f) MuGENT was performed with 5 unselected genome edits. The selected product was  $\Delta wbff::Kan^R$ , while the unselected products targeted four carbohydrate transporters and *dns* for inactivation by replacing ~500 bp of the 5' end of each gene with a premature stop codon. (e) A representative MASC-PCR gel of 24 colonies from the edited population. The targets of each genome edit are indicated on the left and the presence of a band indicates integration of the indicated genome edit. Strains containing 4 genome edits are indicated by the green arrows. (f) Distribution of genome edits in the population determined by MASC-PCR analysis of 48 random mutants.

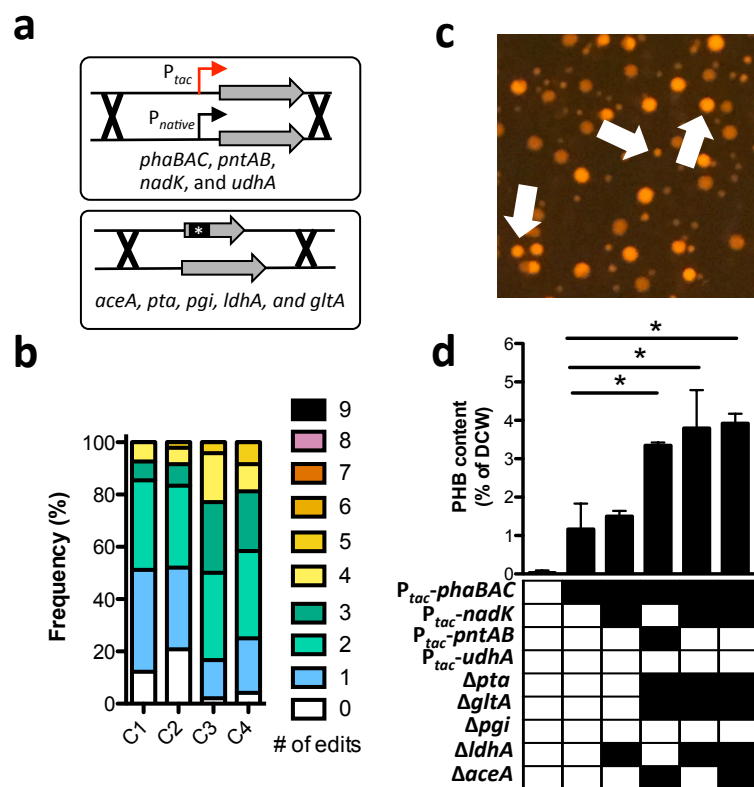

**Fig. 4 – MuGENT rapidly enhances PHB production in *V. natriegens*.** (a) The indicated targets were subjected to either a promoter swap (top) or inactivation by replacing ~500bp of the 5' end of each gene with a short sequence to introduce a premature stop codon (bottom). (b) Distribution of the 9 genome edits in a population of cells following four cycles of MuGENT. (c) Representative image of the mutant pool generated in **b** plated on Nile red containing plates, which stain PHB granules. White arrows indicate colonies with increased fluorescence intensity compared to the parent. (d) PHB content of select MuGENT optimized strains is shown as the % of dry cell weight (DCW). The genotype of each mutant is shown below each bar where a filled box indicates the presence of the genome edit indicated on the left. Data are shown as the mean  $\pm$  SD and are from at least 2 independent biological replicates. \* =  $p < 0.05$ .

**Supplementary material for:**

**Multiplex genome editing by natural transformation (MuGENT)  
for synthetic biology in *Vibrio natriegens***

Triana N. Dalia, Chelsea A. Hayes, Sergey Stolyar, Christopher J. Marx, James B. McKinlay,  
and Ankur B. Dalia

Contents:

**Supplementary protocol** - *Natural transformation / MuGENT in V. natriegens*

**Table S1** – *Strains used in this study*

**Table S2** – *Primers used in this study*

## Supplementary protocol: Natural transformation / MuGENT in *V. natriegens*

### Materials:

1. LBv2 = Mix 400 mL LB + 32 mL sterile 5 M NaCl + 3.4 mL sterile 1 M KCl + 18.5 mL sterile 1 M MgCl<sub>2</sub>
2. 2XIO = 28 g/L of instant ocean sea salts ([www.instantocean.com](http://www.instantocean.com))
3. Transforming DNA (tDNA) –
  - a. selected product = mutant construct that has a selectable marker (antibiotic resistance cassette) that replaces the gene of interest or a neutral locus (for MuGENT). Homology on each side of the mutation can be as little as 0.5 kb. Homology of 3 kb on either side of the mutation results in the highest transformation efficiencies.
  - b. Unselected product (cotransformation / MuGENT) = mutant construct that lacks any selectable marker but has a mutation of interest (deletion, point mutation, promoter swap, etc.). Unselected products should have 3 kb of homology on each side of the mutation for the highest rates of cotransformation / MuGENT.

### Notes:

1. Carb100 = Carbenicillin 100 µg/mL
2. SAD1306 = *V. natriegens* Rif<sup>R</sup> 14048 pMMB67EH-tfoX
3. The pMMB67EH-tfoX plasmid is very stable in *V. natriegens*, therefore, Carbenicillin (Carb) is not needed to maintain it throughout the transformation protocol.

### Procedure:

1. Inoculate 3 mL of LBv2+Carb100+100 µM IPTG in a culture tube with SAD1306. Grow at 30°C in rollerdrum overnight (12-18 hours).
2. Next day, take culture out of incubator and measure OD<sub>600</sub>. Generally, our overnights are at an OD<sub>600</sub> of between 7-10.
3. For each transformation reaction, take 3.5 µL of the overnight culture and dilute into 350 µL of 2XIO+100 µM IPTG (no Carb). Invert gently to mix. Be sure to also prep a “no DNA” control reaction.
4. Add tDNA to each reaction and invert gently to mix:
  - a. For a selected product (i.e. a product that has an antibiotic resistance marker) = ~5-50 ng yields thousands of colonies.
  - b. For cotransformation / MuGENT = use 50 ng of a selected product and ~200 ng of each unselected product
5. Incubate reactions at 30°C statically for 4-6 hours.
6. Next, add 1mL LBv2 (no drug) to each transformation reaction and outgrow at 30°C shaking for 1-2 hours
7. To determine the transformation efficiency:
  - a. Plate all reactions for quantitative culture on media to select for the transformants (i.e. on antibiotic plates that select for integration of selected

product) and on plates without any drug to determine the total CFU in the culture.

- b. Transformation efficiency = transformants CFU / total CFU
8. For cotransformation / MuGENT:
- a. Plate onto media to select for integration of the selected product.
  - b. Pick single colonies and screen by MASC-PCR to identify clones with the desired genome edits.
  - c. To perform a subsequent round of MuGENT, ~200  $\mu$ L of the outgrown transformation can be inoculated into 3 mL of LBv2+Carb100+100  $\mu$ M IPTG+the antibiotic that selects for integration of the selected product (e.g. if  $\Delta dns::Kan^R$  was used in the first cycle of MuGENT, then 50  $\mu$ g/mL Kan would be included in this overnight culture). Start at “step 2” of this procedure to perform the next cycle of MuGENT being sure to use a selected product with a distinct Ab<sup>R</sup> marker.

## Supplementary Tables

**Table S1** – Strains used in this study

| Strain name    | Genotype and antibiotic resistances                                            | Description                                                                                                                                                                                                                                                                   | Reference / (strain#)          |
|----------------|--------------------------------------------------------------------------------|-------------------------------------------------------------------------------------------------------------------------------------------------------------------------------------------------------------------------------------------------------------------------------|--------------------------------|
| WT             | Rif <sup>R</sup>                                                               | Spontaneous Rif <sup>R</sup> derivative <i>V. natriegens</i> ATCC14048 that is the parent isolate for all strains used in this study.                                                                                                                                         | This study (SAD1304)           |
| pMMB-tfoX (Vc) | pMMB- <i>tfoX</i> (Vc) Carb <sup>R</sup>                                       | SAD1304 containing pMMB- <i>tfoX</i> (Vc), a vector containing the <i>tfoX</i> gene from <i>V. cholerae</i> (VC1153) under the control of an IPTG-inducible P <sub>tac</sub> promoter. Vector is derived from pMMB67EH and has a Carb <sup>R</sup> gene for selection.        | This study (SAD1306)           |
| pMMB-tfoX (Vn) | pMMB- <i>tfoX</i> (Vn) Carb <sup>R</sup>                                       | SAD1304 containing pMMB- <i>tfoX</i> (Vn), a vector containing the <i>tfoX</i> gene from <i>V. natriegens</i> (BA890_05980) under the control of an IPTG-inducible P <sub>tac</sub> promoter. Vector is derived from pMMB67EH and has a Carb <sup>R</sup> gene for selection. | This study (TND0322 / SAD1495) |
| pMMB           | pMMB empty vector Carb <sup>R</sup>                                            | SAD1304 containing the pMMB67EH empty vector                                                                                                                                                                                                                                  | This study (TND0321 / SAD1496) |
| WT (Fig. 1D)   | pMMB- <i>tfoX</i> (Vc) Carb <sup>R</sup> , $\Delta dns::Kan^R$                 | SAD1306 with $\Delta dns::Kan^R$ ( $\Delta$ BA890_12415)                                                                                                                                                                                                                      | This study (SAD1313)           |
| $\Delta mutS$  | pMMB- <i>tfoX</i> (Vc) Carb <sup>R</sup> , $\Delta dns::Kan^R$ , $\Delta mutS$ | Generated by cotransformation into SAD1306 with $\Delta dns::Kan^R$ and a product to delete ~500bp of the 5' end of the <i>mutS</i> gene                                                                                                                                      | This study (TND0362 / SAD1497) |

|                         |                                                                                                                                                                                                                         |                                                                                                                                                          |                                |
|-------------------------|-------------------------------------------------------------------------------------------------------------------------------------------------------------------------------------------------------------------------|----------------------------------------------------------------------------------------------------------------------------------------------------------|--------------------------------|
|                         |                                                                                                                                                                                                                         | (BA890_12150).                                                                                                                                           |                                |
| <i>ΔwbfF</i>            | pMMB-tfoX (Vc) Carb <sup>R</sup> ,<br><i>ΔwbfF::Kan<sup>R</sup></i>                                                                                                                                                     | Introduced a <i>ΔwbfF::Kan<sup>R</sup></i> mutation ( <i>ΔBA890_01135</i> ) into the SAD1306 strain background.                                          | This study (CAH509 / SAD1498)  |
| MuGENT quadruple mutant | pMMB-tfoX (Vc) Carb <sup>R</sup> ,<br><i>ΔwbfF::Kan<sup>R</sup></i> , <i>ΔBA890_01815</i> (mannitol transporter),<br><i>ΔBA890_19540</i> (sucrose transporter), <i>ΔBA890_16410</i> (fructose transporter), <i>Δdns</i> | MuGENT into SAD1306 strain with 5 unselected genome edits. This quadruple mutant was whole genome sequenced and no off target mutations were identified. | This study (TND0338 / SAD1499) |
| Fig. 4E, second bar     | pMMB-tfoX (Vc) Carb <sup>R</sup> ,<br><i>Δdns::Kan<sup>R</sup></i> , <i>P<sub>tac</sub>-phaBAC</i>                                                                                                                      | MuGENT into SAD1306 to enhance PHB production. The strain contains the genome edits indicated.                                                           | This study (TND0364 / SAD1500) |
| Fig. 4E, third bar      | pMMB-tfoX (Vc) Carb <sup>R</sup> ,<br><i>Δdns::Kan<sup>R</sup></i> , <i>P<sub>tac</sub>-phaBAC</i> , <i>P<sub>tac</sub>-nadK</i> , <i>ΔldhA</i>                                                                         | MuGENT into SAD1306 to enhance PHB production. The strain contains the genome edits indicated.                                                           | This study (SAD1501)           |
| Fig. 4E, fourth bar     | pMMB-tfoX (Vc) Carb <sup>R</sup> ,<br><i>Δdns::Kan<sup>R</sup></i> , <i>P<sub>tac</sub>-phaBAC</i> , <i>P<sub>tac</sub>-pntAB</i> , <i>Δpta</i> , <i>ΔgltA</i> , <i>ΔaceA</i>                                           | MuGENT into SAD1306 to enhance PHB production. The strain contains the genome edits indicated.                                                           | This study (SAD1502)           |
| Fig. 4E, fifth bar      | pMMB-tfoX (Vc) Carb <sup>R</sup> ,<br><i>Δdns::Spec<sup>R</sup></i> , <i>P<sub>tac</sub>-phaBAC</i> , <i>P<sub>tac</sub>-nadK</i> , <i>Δpta</i> , <i>ΔgltA</i> , <i>ΔldhA</i>                                           | MuGENT into SAD1306 to enhance PHB production. The strain contains the genome edits indicated.                                                           | This study (SAD1503)           |
| Fig. 2E, sixth bar      | pMMB-tfoX (Vc) Carb <sup>R</sup> ,<br><i>Δdns::Spec<sup>R</sup></i> , <i>P<sub>tac</sub>-phaBAC</i> , <i>P<sub>tac</sub>-nadK</i> , <i>Δpta</i> , <i>ΔgltA</i> , <i>ΔldhA</i> , <i>ΔaceA</i>                            | MuGENT into SAD1306 to enhance PHB production. The strain contains the genome edits indicated.                                                           | This study (SAD1504)           |

**Table S2 – Primers used in this study**

| Primer Name                          | Primer Sequence (5'→3')*                         | Description                                                                                            |
|--------------------------------------|--------------------------------------------------|--------------------------------------------------------------------------------------------------------|
| <b>Primers for Mutant constructs</b> |                                                  |                                                                                                        |
| ABD123                               | ATTCCGGGGATCCGTCGAC                              | Amplify MIDDLE Ab <sup>R</sup> (Kan <sup>R</sup> , Spec <sup>R</sup> , or Tm <sup>R</sup> cassettes) F |
| ABD124                               | TGTAGGCTGGAGCTGCTTC                              | Amplify MIDDLE Ab <sup>R</sup> (Kan <sup>R</sup> , Spec <sup>R</sup> , or Tm <sup>R</sup> cassettes) R |
| BBC1264                              | CTAACATGGCTAAGCACCTG                             | <i>Δdns</i> F1 (3kb)                                                                                   |
| BBC1605                              | GCACTTCTTCGCGAATTCGC                             | <i>Δdns</i> F1 (2kb)                                                                                   |
| BBC1607                              | AGTGATTGGGTCACCTATTGG                            | <i>Δdns</i> F1 (1kb)                                                                                   |
| BBC1609                              | AATGAGATTGCGCTTAACCC                             | <i>Δdns</i> F1 (0.5kb)                                                                                 |
| BBC1265                              | gtcgacggatccccggaatAGAGAACAGGTATTTTCATAGTTAAAGTC | <i>Δdns</i> R1                                                                                         |
| BBC1266                              | gaagcagctccagcctacaTAATCCTCACCAATCGCGAC          | <i>Δdns</i> F2                                                                                         |
| BBC1610                              | TCGAGCTTTACGCCACAACG                             | <i>Δdns</i> R1 (0.5kb)                                                                                 |
| BBC1608                              | ACACCTTGGTCGAGGTGAAG                             | <i>Δdns</i> R1 (1kb)                                                                                   |
| BBC1606                              | ATAACGCAGTAGAAAGTATCCAC                          | <i>Δdns</i> R1 (2kb)                                                                                   |
| BBC1267                              | ACTGGTAAGCCATAACGACC                             | <i>Δdns</i> R1 (3kb)                                                                                   |
| DOG0246                              | AGGCTCGTGTTCATGTGAG                              | <i>Δdns</i> 501bp F1                                                                                   |
| DOG0247                              | gctaattcagtttaagcgccatCATAGTTAAAGTCTTTAAAAAGTA   | <i>Δdns</i> 501bp R1                                                                                   |

|         |                                                       |                                                       |
|---------|-------------------------------------------------------|-------------------------------------------------------|
|         | TGACTT                                                |                                                       |
| DOG0248 | atggccgcttaaactgaattagcATCGCTCGTACCTATCTTTATATG       | $\Delta dns$ 501bp F2                                 |
| DOG0249 | TAAGGTGTCTCAAATCTCAATCTAGG                            | $\Delta dns$ 501bp R2                                 |
| BBC1255 | TGAGAAATCTTTGCATCACATC                                | <i>rpsL</i> K43R (Sm <sup>R</sup> ) F1                |
| BBC1256 | GAAGTGTGAGTTAGGTTTTcTAGGTGTAGTAGTGTAACAC              | <i>rpsL</i> K43R (Sm <sup>R</sup> ) R1                |
| BBC1257 | GTGTTTACACTACTACACCTAgAAAACCTAACTCAGCACTTC            | <i>rpsL</i> K43R (Sm <sup>R</sup> ) F2                |
| BBC1258 | GTAGTGACGAGTTGGAGTG                                   | <i>rpsL</i> K43R (Sm <sup>R</sup> ) R2                |
| BBC1552 | GAAGTGCATGAATACGTTGTTCC                               | $\Delta mutS$ 501bp F1                                |
| BBC1553 | gctaattcagtttaagcggcCACAGGTAAGTTCTTTTGTATTTC          | $\Delta mutS$ 501bp R1                                |
| BBC1554 | GTGgccgcttaaactgaattagcCGCACCGCACCGTGAG               | $\Delta mutS$ 501bp F2                                |
| BBC1555 | GAGTATCAGCAACACAGTAACC                                | $\Delta mutS$ 501bp R2                                |
| BBC1347 | TAGCAACTGTTTTAGCGCTG                                  | $\Delta wbfF$ F1                                      |
| BBC1348 | gtcgacggatccccggaatCTTTTATCATCATACTCATTCAATTAAG       | $\Delta wbfF$ R1                                      |
| BBC1349 | gaagcagctccagcctacaTGATGTATAAGCGTCATTTATTTCG          | $\Delta wbfF$ F2                                      |
| BBC1350 | GTTCTGTGCGATAAGTATTGATC                               | $\Delta wbfF$ R2                                      |
| DOG0353 | AATGTCGGCCTTCTGATTAG                                  | $\Delta wbfF$ 501bp F1 (3kb)                          |
| BBC1612 | TAAACTTTATCAGCGACGTCAG                                | $\Delta wbfF$ 501bp F1 (2kb)                          |
| BBC1614 | TTCAGGAACGATGTGCGACAG                                 | $\Delta wbfF$ 501bp F1 (1kb)                          |
| DOG0354 | gctaattcagtttaagcggccatTATCATCATACTCATTCAATTAAGTTTTAA | $\Delta wbfF$ 501bp R1                                |
| DOG0355 | atggccgcttaaactgaattagcACTAATAACGTCAGTGTATACGTA AAC   | $\Delta wbfF$ 501bp F2                                |
| BBC1615 | CCACGCAATGTAGTCATCAATC                                | $\Delta wbfF$ 501bp R2 (1kb)                          |
| BBC1613 | GGATACGCAGCATACTTTCG                                  | $\Delta wbfF$ 501bp R2 (2kb)                          |
| BBC1611 | TTAATTGTGCCTGAGCAAGC                                  | $\Delta wbfF$ 501bp R2 (3kb)                          |
| DOG0271 | AAGTAGTGATGATCCGAAGCG                                 | $\Delta BA890\_01815$ 501bp (mannitol transporter) F1 |
| DOG0272 | gctaattcagtttaagcggccatCATAACAATCCCCGTTTCGATG         | $\Delta BA890\_01815$ 501bp (mannitol transporter) R1 |
| DOG0273 | atggccgcttaaactgaattagcCTTGTATCAGCGCACCTTCTAC         | $\Delta BA890\_01815$ 501bp (mannitol transporter) F2 |
| DOG0274 | ATCGTGGTAAATATCGTCAGGTAG                              | $\Delta BA890\_01815$ 501bp (mannitol transporter) R2 |
| DOG0266 | ATCTCGGCTTGTCTACACCAG                                 | $\Delta BA890\_19540$ (sucrose transporter) F1        |
| DOG0267 | gctaattcagtttaagcggccatCATTGCACACCCCGATTGG            | $\Delta BA890\_19540$ (sucrose transporter) R1        |
| DOG0268 | atggccgcttaaactgaattagcTATTTACCTGTTTTATTGGCGTTTTTC    | $\Delta BA890\_19540$ (sucrose transporter) F2        |
| DOG0269 | TGAACTGAATCCTCGCAGG                                   | $\Delta BA890\_19540$ (sucrose transporter) R2        |
| DOG0256 | ATGCTCGTCATCCATGGGAC                                  | $\Delta BA890\_16410$ (fructose transporter) F1       |
| DOG0257 | gctaattcagtttaagcggccatCATACTGATAACCTTCTGTTCCTTAG     | $\Delta BA890\_16410$ (fructose transporter) R1       |
| DOG0258 | atggccgcttaaactgaattagcACCGCGCAAGAGATCGAAG            | $\Delta BA890\_16410$ (fructose transporter) F2       |
| DOG0259 | TTGGGTGCTTTGCTTCTCG                                   | $\Delta BA890\_16410$ (fructose transporter) R2       |

|         |                                                              |                                                 |
|---------|--------------------------------------------------------------|-------------------------------------------------|
| DOG0261 | ATCTGAACTTAGGATACTCACATC                                     | $\Delta$ BA890_03375 (trehalose transporter) F1 |
| DOG0262 | gctaattcagtttaagcggccatCATAACTTTGCCACCCTGTATTG               | $\Delta$ BA890_03375 (trehalose transporter) R1 |
| DOG0263 | atggccgcttaaactgaattagcTTCTTCTGCCTGTTGGC                     | $\Delta$ BA890_03375 (trehalose transporter) F2 |
| DOG0264 | AGTCAGATGGCGATTGATGTG                                        | $\Delta$ BA890_03375 (trehalose transporter) R2 |
| ABD840  | TTAATTGCGTTGCGCTCACTGCCGACTCCCGTTCTGGATA<br>ATGTTTTTTC       | Amplify MIDDLE $P_{tac}$ construct F            |
| ABD625  | CTGATGAATCCCCTAATGATTTTGG                                    | Amplify MIDDLE $P_{tac}$ construct R            |
| BBC1536 | GTAACGAACGTGTCATCAGTG                                        | $P_{tac}$ - <i>phaBAC</i> F1                    |
| BBC1540 | CGGGCAGTGAGCGCAACGCAATTAATGCAAGCGCACTAAT<br>ATGAC            | $P_{tac}$ - <i>phaBAC</i> R1                    |
| BBC1541 | CAAAATCATTAGGGGATTCATCAGAAAAGATGGAGTCGTC<br>AATGAATAAAG      | $P_{tac}$ - <i>phaBAC</i> F2                    |
| BBC1577 | CGACATCTTCACCAACACG                                          | $P_{tac}$ - <i>phaBAC</i> R2                    |
| BBC1621 | TCTGGAGAGTATGTTGGCC                                          | $P_{tac}$ - <i>pntAB</i> F1                     |
| BBC1622 | cgggcagtgagcgaacgaatCCTTGTATACATATCAATTA<br>TTAGTCCC         | $P_{tac}$ - <i>pntAB</i> R1                     |
| BBC1623 | caaatcattaggggattcatcagAggaggTTGCGTTTTGCAAATCGG<br>TGAC      | $P_{tac}$ - <i>pntAB</i> F2                     |
| BBC1624 | AGACTACGCCAAACTATAACAGC                                      | $P_{tac}$ - <i>pntAB</i> R2                     |
| BBC1616 | CTTCTTCGTCTTCAAACGACG                                        | $P_{tac}$ - <i>nadK</i> F1                      |
| BBC1617 | cgggcagtgagcgaacgaatGCATTAAAGAGGCTTGAATCA<br>GG              | $P_{tac}$ - <i>nadK</i> R1                      |
| BBC1618 | caaatcattaggggattcatcagaggaggTAAATGCTATGAAAAATCC<br>ATGTAACG | $P_{tac}$ - <i>nadK</i> F2                      |
| BBC1619 | CTGCGCTGATAATAAACAAGC                                        | $P_{tac}$ - <i>nadK</i> R2                      |
| BBC1626 | CACAAATAGCGAAGCTAACTG                                        | $P_{tac}$ - <i>udhA</i> F1                      |
| BBC1627 | cgggcagtgagcgaacgaatTATTTGCTTAAACATTGCCTTA<br>GC             | $P_{tac}$ - <i>udhA</i> R1                      |
| BBC1628 | caaatcattaggggattcatcagAggaggTACATCATGGCGCATGT<br>AAATC      | $P_{tac}$ - <i>udhA</i> F2                      |
| BBC1629 | GTGAAAGTATTTTCGCCTTTTCG                                      | $P_{tac}$ - <i>udhA</i> R2                      |
| BBC1636 | GACAAGTCAGAAAGTCCAGTCAC                                      | $\Delta$ <i>pta</i> 501bp F1                    |
| BBC1637 | gctaattcagtttaagcggccatAGACATTCGTAGAGTACCTTTGC               | $\Delta$ <i>pta</i> 501bp R1                    |
| BBC1638 | atggccgcttaaactgaattagcGTTATCATCAACAAGCTAAACGCA<br>C         | $\Delta$ <i>pta</i> 501bp F2                    |
| BBC1639 | GATATCAACGAGTTTGCATCTG                                       | $\Delta$ <i>pta</i> 501bp R2                    |
| BBC1646 | GCTAACATCAATGCGTATGCC                                        | $\Delta$ <i>pgi</i> 501bp F1                    |
| BBC1647 | gctaattcagtttaagcggccatCAACATGGTCTTTATCCCGATG                | $\Delta$ <i>pgi</i> 501bp R1                    |
| BBC1648 | atggccgcttaaactgaattagcGCACTGGCACCATACAAAAAC                 | $\Delta$ <i>pgi</i> 501bp F2                    |
| BBC1649 | CTTTTCTCAGACACTATCGACAC                                      | $\Delta$ <i>pgi</i> 501bp R2                    |
| BBC1641 | AGCCTTCTTCTACATCAAGTGTG                                      | $\Delta$ <i>gltA</i> 501bp F1                   |
| BBC1642 | gctaattcagtttaagcggccatATCCGCCATAACAATCTCCTTTG               | $\Delta$ <i>gltA</i> 501bp R1                   |
| BBC1643 | atggccgcttaaactgaattagcCACTGGCGGCAATGTGTTAC                  | $\Delta$ <i>gltA</i> 501bp F2                   |
| BBC1644 | CAAGAGTACTACGAAGAGCTG                                        | $\Delta$ <i>gltA</i> 501bp R2                   |
| BBC1651 | CTTGTAACACTGCCGCTAAGAG                                       | $\Delta$ <i>ldhA</i> 501bp F1                   |
| BBC1652 | gctaattcagtttaagcggccatCATGGTTCTCTCTCGAAATCATTG              | $\Delta$ <i>ldhA</i> 501bp R1                   |
| BBC1653 | atggccgcttaaactgaattagcATGGAAATCTTTGCCATGATCC                | $\Delta$ <i>ldhA</i> 501bp F2                   |
| BBC1654 | AGTGTGTTACTTATTTGGAGGATG                                     | $\Delta$ <i>ldhA</i> 501bp R2                   |
| BBC1631 | TGAACTGCTGGCGAAAGGAC                                         | $\Delta$ <i>aceA</i> 501bp F1                   |



|                             |                                                       |                                                                                |
|-----------------------------|-------------------------------------------------------|--------------------------------------------------------------------------------|
| BBC1632                     | GCTAATTCAGTTTAAAGCGGCCATTGGTCTATCCCTCTTTAT<br>AATTTGC | $\Delta aceA$ 501bp R1                                                         |
| BBC1633                     | ATGGCCGCTTAAACTGAATTAGCCTAAATGCTTACGAACTG<br>ATGAAATC | $\Delta aceA$ 501bp F2                                                         |
| BBC1634                     | CGATTGAAGCTTGAAGAACAAGC                               | $\Delta aceA$ 501bp R2                                                         |
| <b>Primers for MASC-PCR</b> |                                                       |                                                                                |
| ABD969                      | ATGGCCGCTTAAACTGAATTAGC                               | Universal F primer for all $\Delta 501$ bp genome edits                        |
| DOG0250                     | TGGTTGCCTTGTACTTTGGC                                  | R detect for $\Delta dns$ 501 bp (152bp product)                               |
| BBC1556                     | AGTGATCGAGAACAGCGG                                    | R detect for $\Delta mutS$ 501bp (402bp product)                               |
| DOG0356                     | ATAGCTACCGCGTTCAGGG                                   | R detect for $\Delta wbfF$ 501bp (165bp product)                               |
| DOG0275                     | AGTGACGTGGATGTTTCAGAC                                 | R detect for $\Delta BA890_01815$ 501bp (mannitol transporter) (750bp product) |
| DOG0270                     | AACCCAGTGATACCAGATGG                                  | R detect for $\Delta BA890_19540$ (sucrose transporter) (650bp product)        |
| DOG0260                     | TATTCATCAGTGCAGCGGC                                   | R detect for $\Delta BA890_16410$ (fructose transporter) (352 bp product)      |
| DOG0265                     | TCTTGCATTAACTGTAAATCCACG                              | R detect for $\Delta BA890_03375$ (trehalose transporter) (500 bp product)     |
| BBC435                      | ACACTCTTTGGGGGCCAAAATCATTAGGGGATTCATCAG               | Universal F primer to detect all $P_{tac}$ genome edits                        |
| BBC1551                     | GGTAAACCCTTTGCTGTAAACC                                | R detect for $P_{tac-phaBAC}$ (170bp product)                                  |
| BBC1625                     | CTTGAGCTCGAGAGATACG                                   | R detect for $P_{tac-pntAB}$ (400bp product)                                   |
| BBC1620                     | GATAAAATTCGTGCGGCTC                                   | R detect for $P_{tac-nadK}$ (260bp product)                                    |
| BBC1630                     | AGATAATGATATGACGAGGGTC                                | R detect for $P_{tac-udhA}$ (550bp product)                                    |
| BBC1640                     | CGAATTGGAGAAGTGTGAAG                                  | R detect for $\Delta pta$ (140bp product)                                      |
| BBC1650                     | AACCCAGTCCCAGAATTCAAAC                                | R detect for $\Delta pgi$ (300bp product)                                      |
| BBC1645                     | GATGTTGACGCGTTTTGTTTCG                                | R detect for $\Delta gltA$ (200bp product)                                     |
| BBC1655                     | GGCTTCTACGTTATTTAGTGTC                                | R detect for $\Delta ldhA$ (450bp product)                                     |
| BBC1656                     | TGTTGTGAATACCGCTAGAG                                  | R detect for $\Delta aceA$ (600bp product)                                     |

\*Lower case nucleotides specify overlap regions for SOE PCR
